1 **Isolation and characterisation of watermelon (*Citrullus lanatus*) extracellular vesicles and**  
2 **their cargo**

3 Kate Timms<sup>a,b</sup>, Beth Holder<sup>c</sup>, Anil Day<sup>d</sup>, John McLaughlin<sup>b,e,f</sup>, \*Melissa Westwood<sup>a,b</sup>,  
4 \*Karen Forbes<sup>a,g</sup>

5 <sup>a</sup> Maternal and Fetal Health Research Centre, School of Medical Sciences, University of  
6 Manchester, St Mary's Hospital, Manchester M13 9WL, UK

7 <sup>b</sup> Manchester University NHS Foundation Trust, Manchester Academic Health Sciences  
8 Centre, St Mary's Hospital, Manchester M13 9WL, UK

9 <sup>c</sup> Faculty of Medicine, Department of Metabolism, Digestion and Reproduction, Imperial  
10 College London, London UK

11 <sup>d</sup> Division of Molecular and Cellular Function, School of Biological Sciences, University of  
12 Manchester, St Mary's Hospital, Manchester M13 9WL, UK

13 <sup>e</sup> Division of Diabetes, Endocrinology and Gastroenterology, University of Manchester,  
14 Manchester, United Kingdom

15 <sup>f</sup> Department of Gastroenterology, Salford Royal NHS Foundation Trust, Salford, United  
16 Kingdom

17 <sup>g</sup> Discovery and Translational Science Department, Leeds Institute of Cardiovascular and  
18 Metabolic Medicine, Faculty of Medicine and Health, University of Leeds, UK.

19 \*Joint corresponding authors: [k.a.forbes@leeds.ac.uk](mailto:k.a.forbes@leeds.ac.uk);

20 [Melissa.westwood@manchester.ac.uk](mailto:Melissa.westwood@manchester.ac.uk)

21  
22 **Keywords: extracellular vesicles, exosomes, plastid, multivesicular body, miRNA**  
23

24

25 **Abstract**

26 Extracellular vesicles (EVs) facilitate cell-cell communication in animals and are integral  
27 to many physiological and pathological processes. Evidence for the presence and

28 function of EVs in plants is limited. Here, we report that EVs derived from watermelon  
29 fruit mesocarp are of similar size and morphology to the animal EV subtype known as  
30 exosomes. Analysis of EV constituents revealed that watermelon EVs are negative for  
31 endoplasmic reticulum markers, and that the miRNA and protein profiles differ from that  
32 of watermelon mesocarp cells, suggesting that these EVs are actively synthesised and  
33 are not merely cellular debris. Furthermore, we report a panel of proteins found in in  
34 watermelon EVs as well as the published proteomes of grape, grapefruit, lemon and  
35 *Arabidopsis thaliana* EVs that are novel potential plant EV markers. Bioinformatic  
36 analyses suggest that plastids and multivesicular bodies are likely sites of biogenesis  
37 for EVs from watermelon and other plants. Predicted functional roles of watermelon  
38 EVs include development and metabolism, with several of their cargo molecules likely  
39 to be key in regulation of fruit development and ripening. Further understanding of how  
40 EVs may contribute to these processes would improve understanding of plant cell-cell  
41 communication and could aid in the harnessing of plant EVs for greater temporal  
42 control of crop development/ripening for the agricultural and retail industries.

#### 43 **Main**

44 An ever-growing literature emphasises the critical role played by extracellular vesicles  
45 (EVs) in mediating cell-cell communication, both in health and disease, in the bacterial,  
46 fungal and animal kingdoms<sup>1,2</sup>. These EVs travel in the extracellular environment  
47 before internalisation by recipient cells, delivering their cargo and altering cell function<sup>3-</sup>  
48 <sup>5</sup>. Whilst EV-like particles have been observed in plants<sup>6-16</sup>, their identity as true EVs  
49 (i.e., vesicles that are actively secreted, rather than mere cellular fragments) is yet to be  
50 confirmed. The term 'EVs' encapsulates several classes of cellular-derived vesicles  
51 with varying size, composition and function. One of most studied classes of mammalian  
52 EVs are exosomes, which are derived from membrane invagination in the late

53 endosomes known as multivesicular bodies (MVBs)<sup>17,18</sup>. Exosomes are generally  
54 considered to be 50-150nm EVs that contain a range of cargo molecules, including  
55 proteins, messenger RNAs (mRNAs) and microRNAs (miRNAs), which are actively  
56 sorted into exosomes during exosome formation, resulting in a differing cargo profile to  
57 that of the cell of origin<sup>5,19-24</sup>. Differing cell and EV cargo demonstrates that EVs are  
58 purposeful and energy demanding cell-cell signals, not just passive cellular products.  
59 Microvesicles are larger (100nm-1 $\mu$ m) EVs which bud directly from the plasma  
60 membrane<sup>25</sup>, meaning that their contents more closely resemble that of the donor cell.  
61 The third major EV subtype is the 1-2 $\mu$ m apoptotic bodies, which bleb off the plasma  
62 membrane in apoptotic cells<sup>26,27</sup> and can contain whole organelles or nuclear  
63 fragments<sup>28</sup>.

64 In plants, MVB fusion with the plasma membrane at sites of infection has been  
65 observed using electron microscopy (EM), and is thought to be involved in the  
66 response to pathogens<sup>29</sup>. Plant EVs have been shown to contain small RNAs<sup>30</sup>, such  
67 as miRNAs, which are suggested to suppress virulence genes in fungal pathogens<sup>31,32</sup>.

68 Despite these more recent studies, majority of the studies reporting EV-like particles in  
69 plants<sup>6-16</sup> have focused on dietary ingestion of plant EVs by animals, meaning that the  
70 particles described in such studies have been characterised largely in the context of  
71 their impact on mammalian cells, rather than the plant they originated from<sup>8,11,13</sup>. Initial  
72 reports on the presence of membrane phospholipids in plant extracellular fluid<sup>33,34</sup> were  
73 followed by a study aiming to determine whether these lipids were within EVs<sup>15</sup>. Using  
74 the classical differential ultracentrifugation method of EV isolation followed by EM, EV-  
75 like particles were visualised in pellets from apoplastic fluid at both 40,000xg and  
76 100,000xg<sup>15,35</sup>. In keeping with their potential identity as EVs, these particles were

77 found to contain at least a limited protein cargo. Further characterisation of the  
78 components, biogenesis and function of plant EVs has yet to be performed.  
79 Determining the origin and function of plant EVs is essential to understanding plant cell-  
80 to-cell communication, not only to increase fundamental knowledge of plant physiology,  
81 but in understanding how these processes may be beneficially manipulated.  
82 Watermelon fruits (*Citrullus lanatus*) contain an abundance of extracellular fluid and  
83 have, at ripeness, a delicate mesocarp, allowing for the isolation of large quantities of  
84 extracellular fluid without risk of disrupting cells and creating cellular fragments which  
85 could erroneously be identified as EVs. As such, watermelon fruit is an ideal model for  
86 plant EV characterisation. Here, we show that watermelon fruit contains EVs – likely  
87 originating from plastids and MVB – which differ in miRNA and protein profiles to  
88 mesocarp cells. Furthermore, we identify a panel of potential plant-specific EV markers  
89 and predict that watermelon EVs have likely roles in sugar metabolism and fruit  
90 development/ripening.

## 91 **Results**

### 92 **Characterisation of extracellular vesicles from watermelon fruit mesocarp**

93 Sequential ultracentrifugation was used to isolate EVs from watermelon mesocarp.  
94 Parallel isolation from culture medium conditioned by human epithelial cells was  
95 performed to validate the isolation procedure. The presence of authenticated human  
96 EV markers<sup>36-39</sup> (ALIX<sup>+ve</sup>/CD63<sup>+ve</sup>/CANX<sup>-ve</sup>; Figure 1a) in the EVs from human epithelial  
97 cell conditioned media confirmed the suitability of our approach. Nanoparticle tracking  
98 analysis and transmission electron microscopy revealed that watermelon and human  
99 EVs have a similar morphology (Figure 1b) and size ( $117\text{nm} \pm 14.61$  Vs  $129\text{nm} \pm 28$   
100 respectively,  $p=0.68$ ; Figure 1b). However, it should be noted that the watermelon EVs

101

102  
103  
104  
105  
106  
107  
108  
109  
110  
111  
112  
113  
114  
115  
116  
117

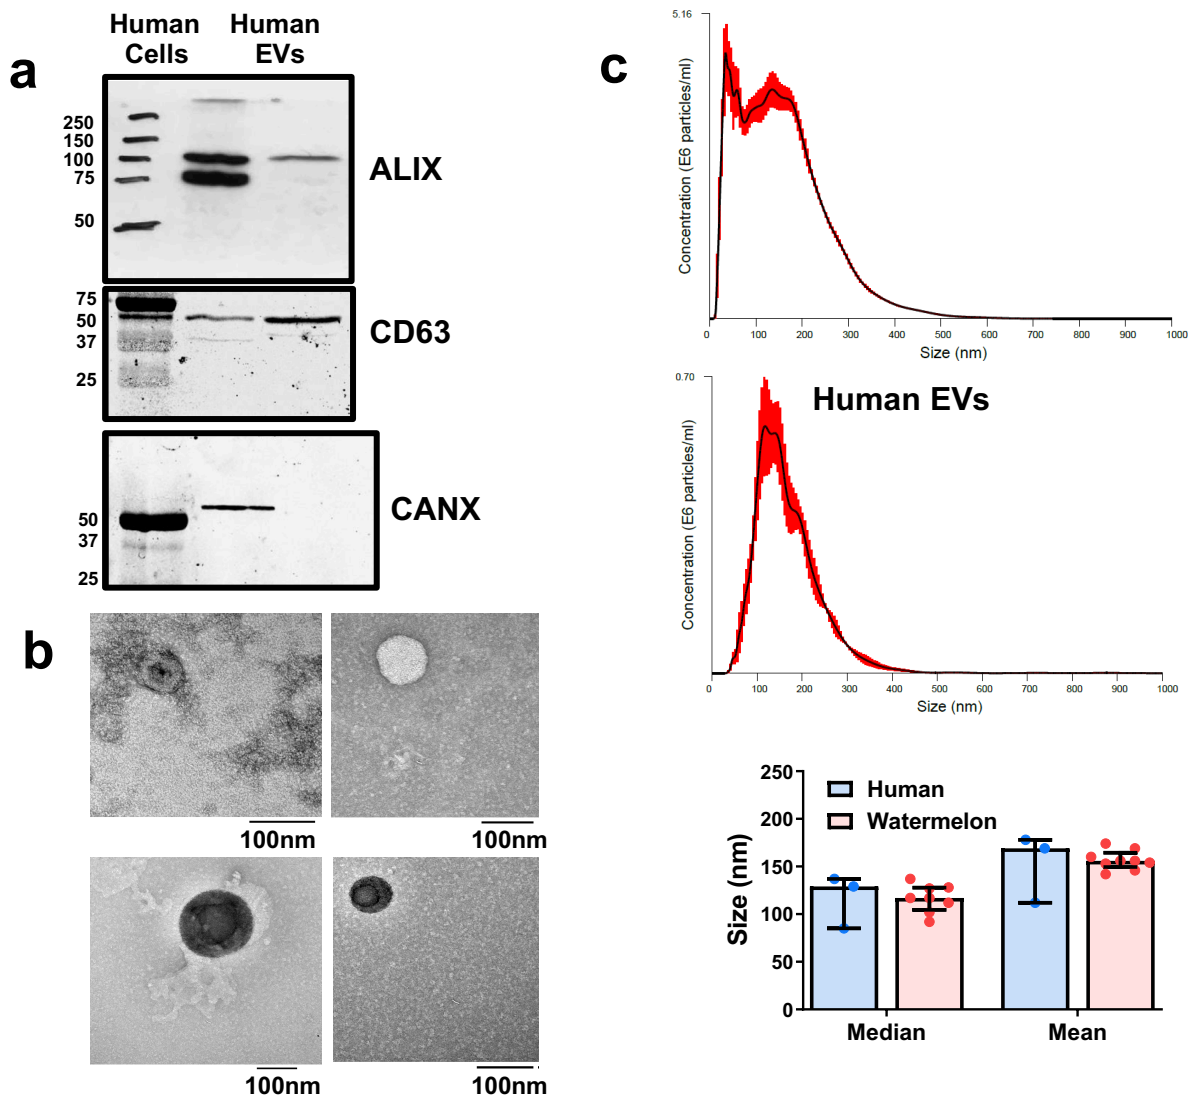

118

119 **Figure 1. Watermelon extracellular vesicles (EVs) resemble human exosomes. a,**  
120 Western blot analysis of positive (ALIX and CD63) and negative (CANX) markers for  
121 exosomes in EVs isolated by differential ultracentrifugation from the conditioned media  
122 of human Caco-2 cells. **b,** Watermelon EVs display vesicular morphology reminiscent  
123 of human exosomes when analysed using transmission electron microscopy. EVs show  
124 characteristic cup-shaped morphology. **c,** Size comparison of watermelon and human  
125 derived EVs. Particles isolated by ultracentrifugation from watermelon mesocarp and  
126 human Caco-2 cell conditioned culture media were subjected to nanoparticle tracking  
127 analysis to determine size. Representative size distribution graph for watermelon EVs  
128 (n=8) and human EVs (n=3) for both mean (p= 0.6364) and median size (p= 0.6788)  
129 are shown. Data are shown as median  $\pm$  IQR. (n=3-8; Mann-Whitney test).

130 isolated here appear to consist of 2 subsets, one with a peak around 40-60nm in  
131 diameter and one around 150nm, potentially reflecting two distinct subtypes of EVs.  
132 The average yield of watermelon EVs was  $1.85 \times 10^{10} \pm 1.63 \times 10^{10}$  EVs/ml of watermelon  
133 juice. On average, the DNA yield was  $2.12 \times 10^{12} \pm 9.57 \times 10^{11}$ , the RNA yield was  
134  $7.64 \times 10^8 \pm 9.31 \times 10^8$  particles/ng RNA and the protein yield was  $1.94 \times 10^9 \pm 7.14 \times 10^8$   
135 particles/ $\mu$ g protein. Relative to the starting volume of juice, the EV DNA yield was  $0.38$   
136  $\pm 0.11$   $\mu$ g/ml, the EV RNA yield was  $3.45 \pm 1.70$   $\mu$ g/ml and the EV protein yield was  
137  $96.79 \pm 32.6$  ng/ml.

### 138 **Protein and miRNA profiling of watermelon EVs**

139 Next, to rule out the possibility that the isolated watermelon EVs were merely products  
140 of cellular disruption or breakdown, we compared their protein and miRNA content to  
141 that of their parent mesocarp cells. The full list of proteins identified (1838) in  
142 watermelon EVs and cells is available in Supplementary table S1. 28.13% of proteins  
143 were enriched and 34.98% were depleted by >1.5-fold in EVs compared to parent cells.  
144 Of note, a number of cell compartment markers for the endoplasmic reticulum (ER),  
145 mitochondria, nucleus and chloroplast, including established negative markers of  
146 mammalian EVs such as ER-localised calnexin and nuclear-localised histone 2B, are  
147 depleted in EVs compared to cells (Table 1). Principal component analysis and  
148 hierarchical clustering analysis indicated that the profile of proteins in watermelon  
149 mesocarp EVs differed from that of cells, though the profile varied between different  
150 watermelons (Figure 2a-b). Further analysis of watermelon EV content was performed  
151 by profiling the miRNAs. This demonstrated that 25.00% and 35.71% were >1.5-fold  
152 enriched and depleted respectively in EVs compared to mesocarp cells (Figure 2c-e;  
153 full results in Supplementary table 2). Principal component analysis confirmed that EVs  
154 have a distinct profile of miRNAs compared to their parent cells (Figure 2c).

| <b>Cellular Compartment</b> | <b>Accession</b> | <b>Protein Name</b>                                          | <b>Relative abundance in Watermelon Cells</b> | <b>Relative abundance in Watermelon EVs</b> |
|-----------------------------|------------------|--------------------------------------------------------------|-----------------------------------------------|---------------------------------------------|
| Nucleus                     | Cla019920        | Histone H2A                                                  | 1.33                                          | 0.34                                        |
|                             | Cla001861        | Histone H2B                                                  | 2.334                                         | 0.34                                        |
|                             | Cla015219        | Histone H3 expressed                                         | 1.34                                          | 0                                           |
|                             | Cla005035        | Histone H4                                                   | 4.34                                          | 0.67                                        |
| Endoplasmic Reticulum       | Cla002648        | Calnexin                                                     | 7.34                                          | 0.33                                        |
|                             | Cla013928        | Protein disulfide isomerase                                  | 11.83                                         | 7.33                                        |
|                             | Cla005127        | Cytochrome P450                                              | 2.67                                          | 0.00                                        |
| Mitochondria                | Cla000734        | Cytochrome c1                                                | 4                                             | 0                                           |
|                             | Cla016943        | Cytochrome C-2                                               | 1.00                                          | 0.34                                        |
|                             | Cla022586        | Mitochondrial ADP/ATP carrier protein 3                      | 8.34                                          | 1.67                                        |
|                             | Cla002230        | Mitochondrial ADP/ATP carrier protein 1                      | 2.67                                          | 0                                           |
| Chloroplast                 | Cla010898        | Phytoene desaturase                                          | 7                                             | 2.67                                        |
|                             | Cla006309        | Sulfite reductase                                            | 5                                             | 0.34                                        |
|                             | Cla008831        | Plastid lipid-associated protein 3, chloroplastic            | 1.67                                          | 0.67                                        |
|                             | Cla000424        | Chloroplast outer envelope protein 37                        | 2                                             | 1.67                                        |
|                             | Cla020214        | Zeaxanthin epoxidase chloroplastic                           | 1                                             | 0                                           |
|                             | Cla008113        | Tic110 family transporter chloroplast inner envelope protein | 4.33                                          | 1                                           |

155

156 **Table 1: Depletion of cell compartment markers in watermelon extracellular**  
 157 **vesicles (EVs) in comparison to watermelon cells.**

158

159

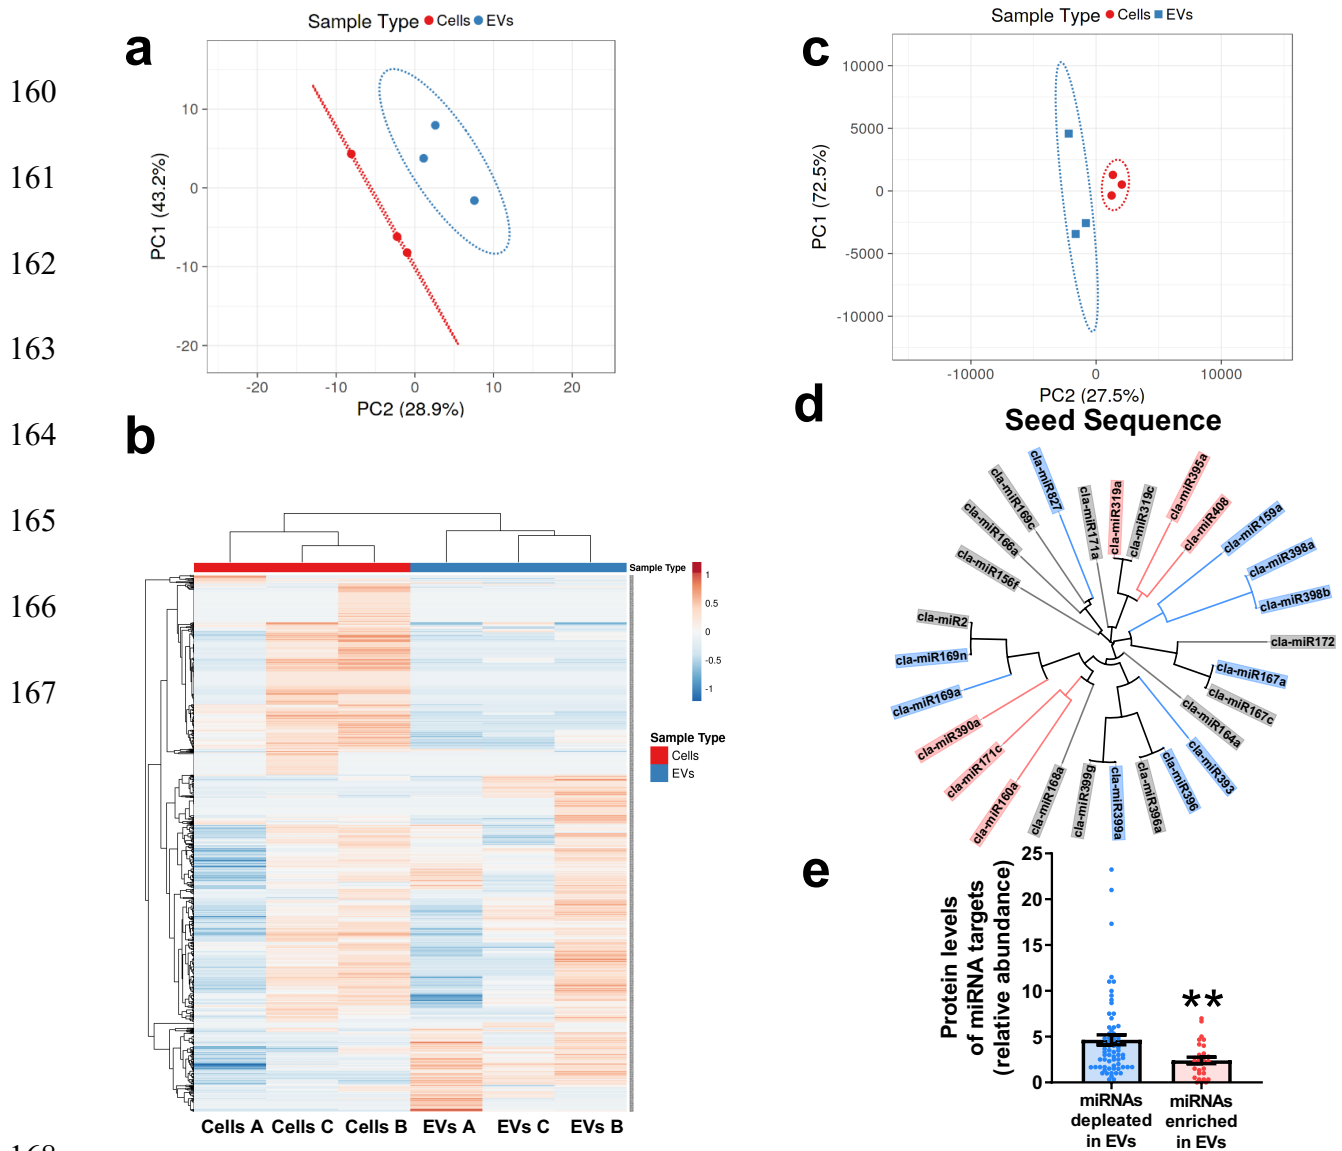

168  
 169 **Figure 2: Characterisation of the watermelon extracellular vesicle (EV) proteins**  
 170 **and miRNAs.** a-b The proteome of watermelon mesocarp EVs differs from that of cells.  
 171 Watermelon protein profiles (n=3) were analysed using principal component analysis  
 172 (a; PCA; log<sub>10</sub>(relative abundance)) or hierarchical clustering (b). c-e, miRNAs with a  
 173 1.5-fold higher/lower level in EVs than in cells were designated as enriched/depleted  
 174 (n=3). c, PCA of miRNA levels in mesocarp cells and EVs (log<sub>10</sub>( $\Delta\Delta$ Ct)). d, miRNA  
 175 relationship based upon 8-base seed sequences, coloured for enrichment (red),  
 176 depletion (blue) or neutral (grey) localisation in EVs with respect to cells. e, Protein  
 177 levels of mRNAs targeted by miRNAs are enriched (n=29) or depleted (n=67) in EVs.  
 178 Data are shown as mean  $\pm$  SEM (Mann-Whitney test; p= 0.0045; \*\* = p<0.01).



179 Together these data suggest that the EVs isolated in this study are not merely  
180 fragments of organelles produced during cellular breakdown or EV isolation.  
181 The enrichment of specific miRNAs in watermelon EVs compared to cells suggests  
182 active sorting of miRNAs in watermelon. In mammals, miRNAs are actively sorted into  
183 EVs, in a sequence-dependent manner, by hnRNPA2B1<sup>23</sup>. To determine whether the  
184 same may be true of plant EVs, a BLAST search for hnRNPA2B1 was conducted. No  
185 sufficiently orthologous protein was found in the Viridiplantae kingdom. Furthermore,  
186 analysis of the relationship between miRNA sequence, sequence motif or secondary  
187 structure and enrichment/depletion in watermelon EVs (data not shown) revealed no  
188 obvious association. However, when the miRNA seed sequence was considered in  
189 isolation, it did appear that some related seed sequences were similarly regulated  
190 (Figure 2d). As the seed sequence of miRNAs is the most important region for miRNA-  
191 mRNA binding, and mRNA abundance is inversely linked to miRNA sorting EVs in  
192 animals<sup>40</sup>, we hypothesised the relationship between seed sequence and EV  
193 enrichment may relate to the abundance of target mRNAs within watermelon cells.  
194 Whilst the levels of mRNAs in watermelon cells are unknown, our analysis of the  
195 proteins present in watermelon cells and EVs can be used as a proxy measure of the  
196 abundance of their mRNAs; our data show that the levels of the cellular proteins that  
197 are the targets of miRNAs enriched in EVs were lower than those that are the targets of  
198 miRNAs depleted in EVs (Figure 2e;  $p < 0.01$ ). A full list of watermelon EV miRNA  
199 targets is given in Supplementary Table 3.

## 200 **Identification of potential plant EV markers**

201 There is a growing consensus on the use of several lipid-associated/membrane-  
202 spanning and cytosolic proteins as suitable markers of mammalian EVs<sup>39</sup>. Likewise,  
203 there is a proposed range of 'negative markers to distinguish human EVs, particularly

204 the MVB derived exosomes, from cellular debris<sup>39</sup>. We also demonstrated the depletion  
205 of some of these 'negative' markers, such as calnexin, in watermelon EVs compared to  
206 watermelon cells (Table 1).

207 Currently, there are no widely recognised positive markers of plant EVs and there are  
208 no sufficient homologs of human markers present in the watermelon proteome,  
209 suggesting mechanisms of biosynthesis may differ. To discover potential novel  
210 marker(s) of plant EVs, the proteomes of EVs from watermelon and EV-like particles  
211 previously isolated from grape<sup>11</sup>, grapefruit<sup>13</sup>, lemon<sup>14</sup> and *Arabidopsis thaliana*<sup>6</sup> were  
212 compared (Table 2). One protein, enolase, is present in the EVs of all 5 species and,  
213 interestingly, is the second most commonly reported protein in human EVs<sup>41</sup>. Of the 15  
214 remaining potential markers with a human ortholog, all have been identified in human  
215 EVs and 11 are within the top 250 most commonly identified human EV proteins<sup>42</sup>.

### 216 **Plastids and multivesicular bodies are likely sites of watermelon extracellular vesicle** 217 **biogenesis**

218 We next interrogated the EV protein profile using gene ontology (GO) enrichment  
219 analysis, reasoning that such information might help to identify the site of EV  
220 biogenesis. This indicated that the majority of the EV proteins are from either the  
221 cytoplasm or the plastid and its derivatives (Figure 3a). The plastid is a known site of  
222 vesicles<sup>43-49</sup> approximating the size of the smaller peak identified in nanoparticle  
223 tracking analysis of watermelon EVs (Figure 1c), making the plastid a credible  
224 candidate site for plant EV biogenesis. Further prediction based on cellular localisation  
225 signals and comparison of the watermelon EV proteome with previously published  
226 data<sup>50</sup> supports this hypothesis, with 73.58% of watermelon EV proteins  
227 predicted/observed to be within plastids (Figure 3b). The same high percentage of  
228 plastid proteins was seen in other plant species for which data was available.

| Accession | Protein name                                                         | Fold regulation in watermelon EVs compared to watermelon cells | No. plant species identified in (Max. 5) | Within top 250 human EV proteins? (N/A indicates no human ortholog) |
|-----------|----------------------------------------------------------------------|----------------------------------------------------------------|------------------------------------------|---------------------------------------------------------------------|
| Cla001345 | Vesicle-associated protein 4-2                                       | Only detected in EVs                                           | 4                                        | N/A                                                                 |
| Cla020983 | Vesicle-associated membrane protein 7C                               | +11                                                            | 4                                        | No                                                                  |
| Cla023344 | Sodium/calcium exchanger family protein                              | +6                                                             | 4                                        | No                                                                  |
| Cla016803 | Profilin                                                             | +5                                                             | 4                                        | Yes                                                                 |
| Cla017822 | V-type proton ATPase subunit G                                       | +3.17                                                          | 4                                        | Yes                                                                 |
| Cla018715 | Outer membrane lipoprotein B1c                                       | +2.75                                                          | 4                                        | N/A                                                                 |
| Cla012175 | Triosephosphate isomerase                                            | +2.31                                                          | 4                                        | Yes                                                                 |
| Cla010547 | Adenosylhomocysteinase                                               | +2.09                                                          | 4                                        | Yes                                                                 |
| Cla019014 | Enolase                                                              | +2.01                                                          | 5                                        | Yes                                                                 |
| Cla011437 | Aquaporin 1                                                          | +2                                                             | 4                                        | No                                                                  |
| Cla007587 | Malate dehydrogenase                                                 | +1.63                                                          | 4                                        | Yes                                                                 |
| Cla012184 | Pyrophosphate-energized vacuolar membrane proton pump family protein | +1.54                                                          | 4                                        | N/A                                                                 |
| Cla019719 | Tubulin beta chain                                                   | +1.41                                                          | 4                                        | Yes                                                                 |
| Cla015847 | Peptidyl-prolyl cis-trans isomerase                                  | +1.31                                                          | 4                                        | Yes                                                                 |
| Cla007792 | Actin                                                                | +1.07                                                          | 4                                        | Yes                                                                 |
| Cla023447 | Catalase                                                             | -1.7                                                           | 4                                        | No                                                                  |
| Cla005204 | Heat shock protein 90                                                | -2.26                                                          | 4                                        | Yes                                                                 |
| Cla012806 | Nucleoside diphosphate kinase                                        | -13.99                                                         | 4                                        | Yes                                                                 |

229

230 **Table 2: Candidate plant extracellular vesicle markers.**

231

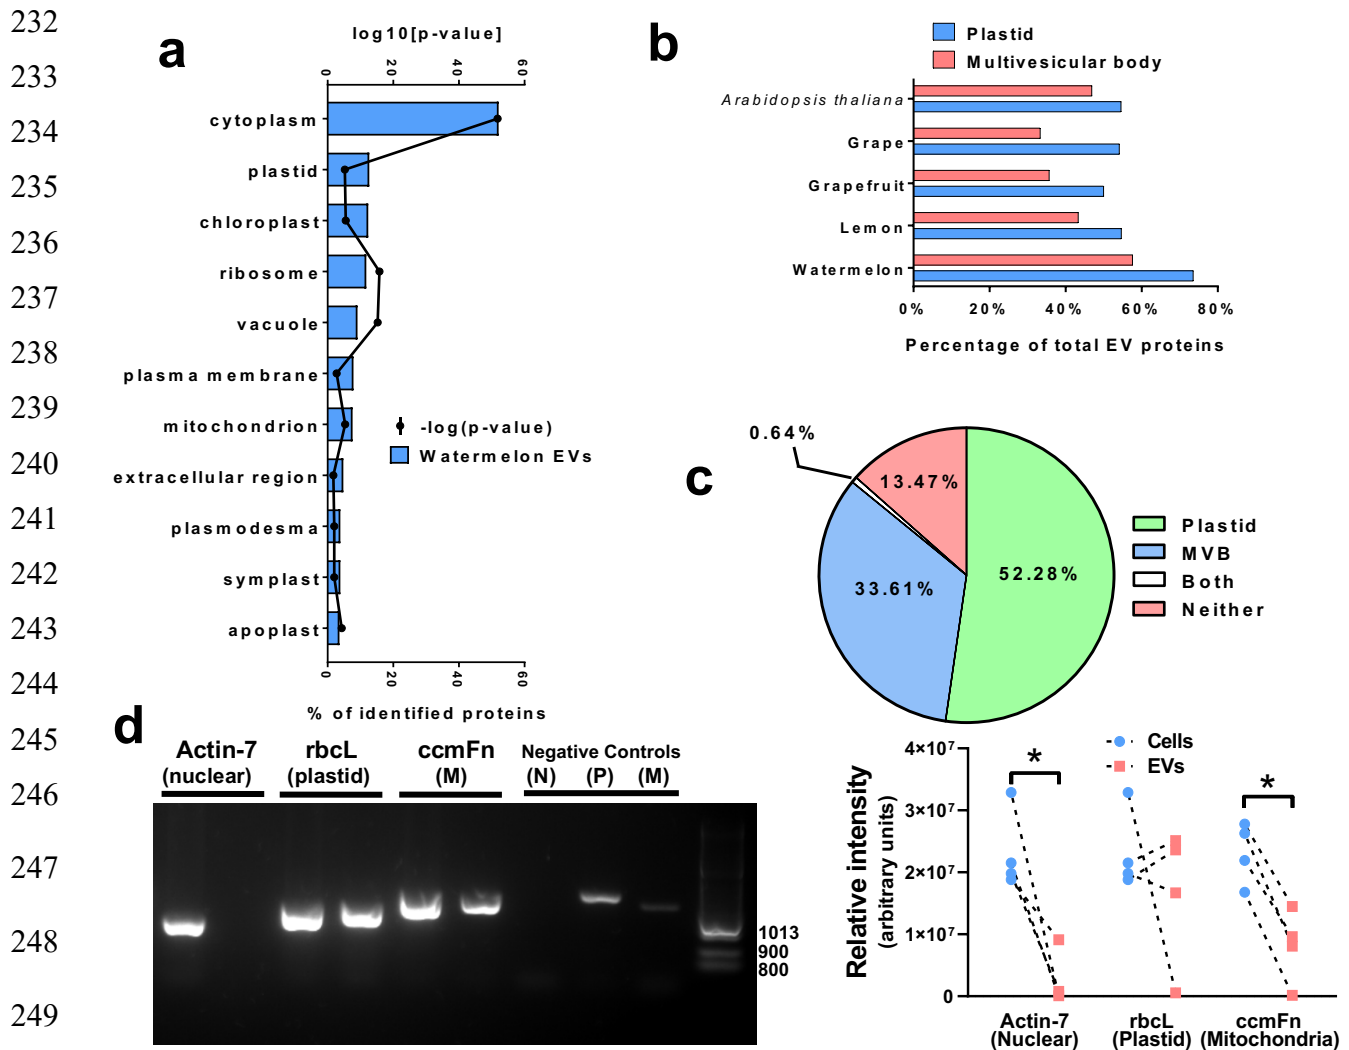

250 **Figure 3: Watermelon EVs are likely derived from plastids and multivesicular**  
 251 **bodies.** **a**, GO enrichment of watermelon EV protein localisation (Bonferroni p-value  
 252 correction). **b**, Comparison of the percentage of multivesicular body (MVB) and plastid  
 253 proteins present in EVs from watermelon and those previously published for EVs in  
 254 lemon<sup>14</sup>, grapefruit<sup>13</sup>, grape<sup>11</sup> and *Arabidopsis thaliana*<sup>6</sup> were aligned to the proteomes  
 255 of watermelon chromoplasts<sup>50</sup> and *Arabidopsis thaliana* multivesicular bodies<sup>51</sup>. **c**, A  
 256 comparison of the percentage of the total watermelon EV protein mass predicted and/or  
 257 reported to reside cellularly within plastids, MVB, both or neither organelle. **d**, Relative  
 258 quantification of DNA of nuclear (N; actin-7; p=0.0286), plastid (P; rbcL; p= 0.6857) and  
 259 mitochondrial (M; ccmFn; p= 0.0286) origin in EVs compared to cells (n=4). Data are  
 260 shown as median (Mann-Whitney test; \* = p<0.05).

261 Furthermore, the yellow-orange colouration of watermelon EV pellets suggests the  
262 presence of lycopene, which is produced and stored within watermelon chromoplasts.  
263 Interestingly, our analysis of the published proteomes of EV-like particles isolated from  
264 grape<sup>11</sup>, grapefruit<sup>13</sup>, lemon<sup>14</sup> and *Arabidopsis thaliana*<sup>6</sup> suggests that plastids might be  
265 a common site of EV synthesis in plants (Figure 3b).

266 Animal exosomes originate from MVB. As neither GO enrichment nor predictive  
267 localisation based upon sequence are equipped for the assessment of MVB proteins,  
268 BLAST was used to align the proteome of EVs from watermelon, grape, grapefruit,  
269 lemon and *Arabidopsis thaliana* to that of *Arabidopsis thaliana* MVB<sup>51</sup>. This revealed  
270 that the majority of the non-plastid EV proteins are present in plant MVB, with some  
271 proteins being present in both organelles (Figure 3b). When protein abundance is  
272 considered, rather than the number of individual proteins, 52.28% of all protein mass in  
273 watermelon EVs is from proteins which reside solely in plastids, whilst proteins residing  
274 solely in MVB account for just 33.61% of the total protein mass in watermelon EVs  
275 (Figure 3c), suggesting that EVs of potential plastid origin may be more abundant than  
276 those of MVB origin.

277 Proteins are not the only plastid component present in EVs. Whilst DNA of nuclear  
278 (actin-7) and mitochondrial (ORF204) origin are depleted in EVs compared to cells  
279 (Figure 3d;  $p < 0.05$ ), the level of plastid DNA (rbcL) in cells and EVs was similar. The  
280 level of plastid DNA present in EVs varied between watermelons. Nonetheless, these  
281 data further support a plastid origin for at least a subset of watermelon EVs.

### 282 **Predicted roles for watermelon extracellular vesicles in fruit development/ripening**

283 Next, we turned to predicting the potential roles of watermelon EVs by examining GO  
284 cellular process and pathway enrichment for EV proteins and miRNA targets. The  
285 targets of miRNAs that are enriched in cells appear to be concerned mainly with the

286 various processes of cellular metabolism (Figure 4; blue), whereas the targets of  
287 miRNAs enriched in watermelon EVs are primarily involved in processes of  
288 development and reproduction (Figure 4; red). Analysis of the proteins enriched in  
289 watermelon cells and EVs suggests that they have broadly similar roles in both  
290 compartments (Figure 5a). However, whilst the processes and pathways of proteins  
291 enriched in cells cover a wide range of cellular metabolic processes, those for proteins  
292 enriched in EVs focus on nucleic acid metabolism, suggesting a role in gene  
293 expression. When considered in isolation, those watermelon EV proteins that are  
294 predicted to usually localise to the MVB or the plastid are also mostly involved in  
295 metabolism (Figure 5b). The second highest enriched biological process theme in MVB  
296 is gene expression (11.1%), with nucleic acid metabolism also featuring in the  
297 metabolism processes. However, in plastids, the second highest enriched biological  
298 process theme is response to reactive oxygen species (4.61%), followed closely by cell  
299 signalling (4.15%), and gene expression does not feature. These data suggest distinct  
300 roles for the proposed MVB-derived and plastid-derived EV subtypes.

301 As development/reproduction, metabolism and control of reactive oxygen species are  
302 all important for fruit production and ripening, we hypothesised that watermelon EVs  
303 could have a role in these processes. We therefore analysed an open access dataset<sup>52</sup>  
304 of the transcripts expressed in the fruit flesh of the LSW177 variety of watermelon on  
305 days 10-34 after pollination, predicting that the mRNA targets of miRNA found in  
306 watermelon EVs would be downregulated over time if EVs truly influence fruit  
307 development/ripening. The data presented in Figure 6 support this hypothesis as the  
308 levels of watermelon EV miRNA targets decrease across the timescale of fruit  
309 development and ripening, reaching significantly lower expression than the average of  
310 all watermelon transcripts at day 34 ( $p < 0.0001$ ) when the fruit is considered ripe.

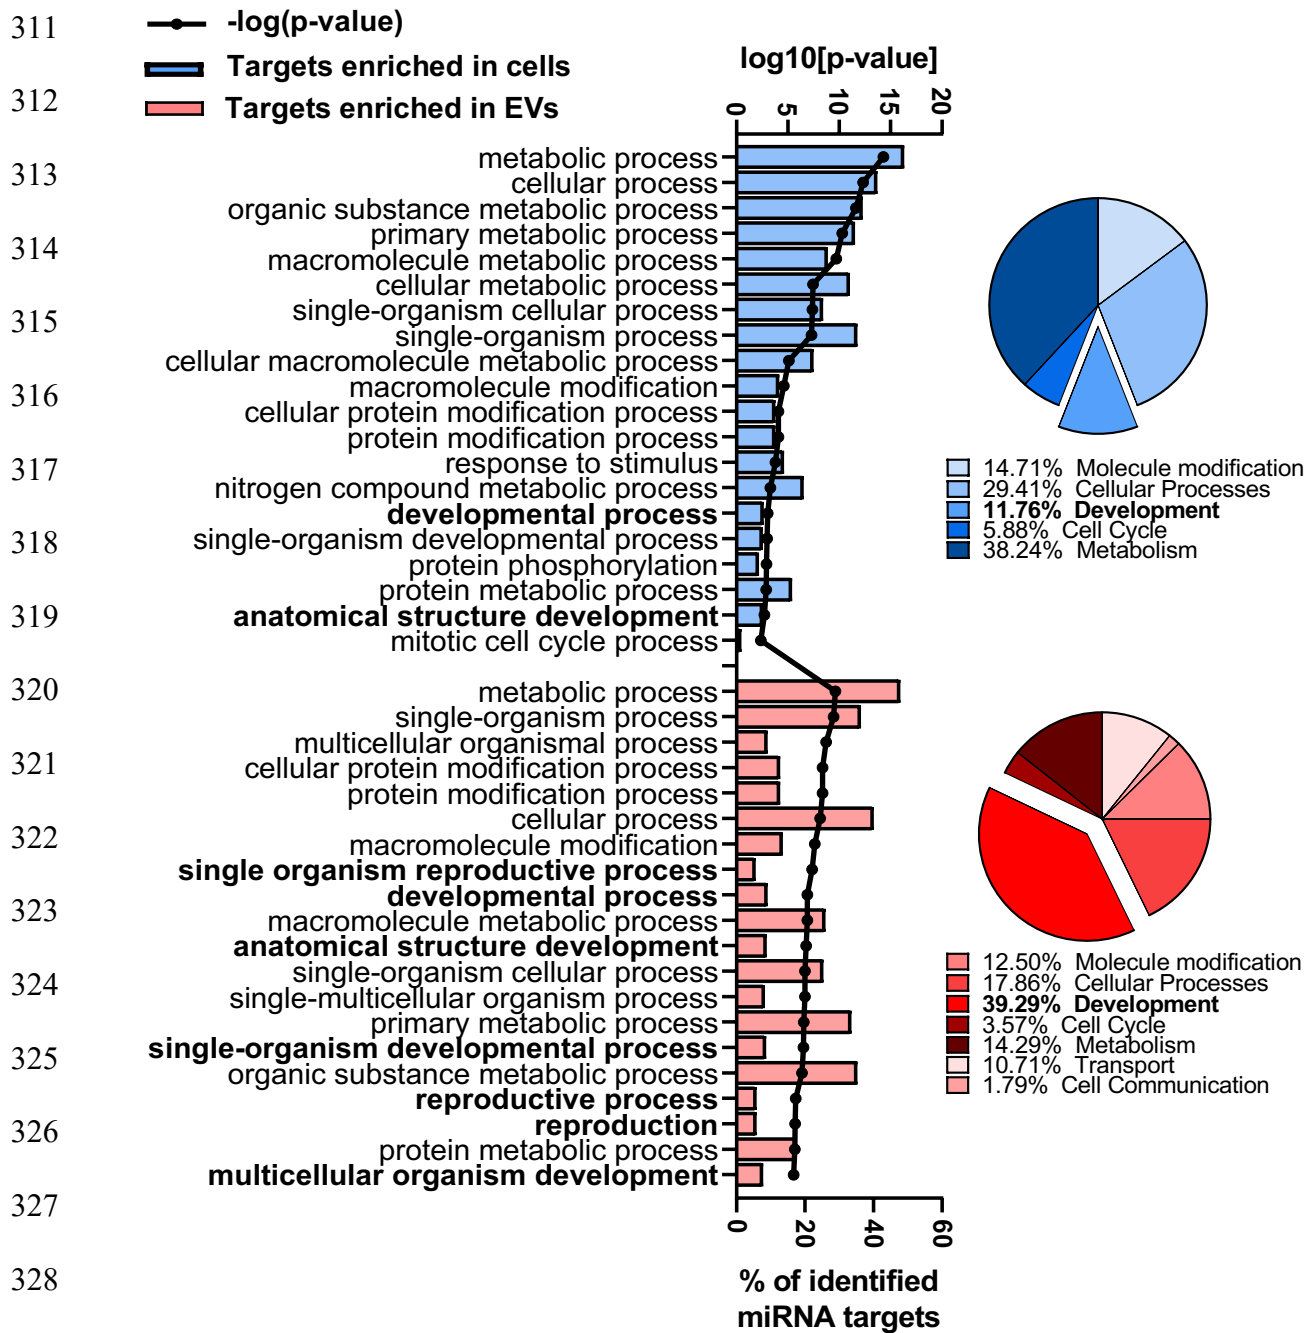

329 **Figure 4: A potential role for watermelon EVs miRNAs in fruit**

330 **development/ripening.** Functions of miRNAs (via their predicted mRNA targets) which

331 are enriched in watermelon cells (blue) or EVs (red) were predicted through GO biological

332 process enrichment analysis. Top biological processes based upon p-value are given in

333 the bar chart and all processes grouped by theme given in the pie charts (development

334 emphasised). p-value correction for multiple testing was performed using the Bonferroni

335 method.

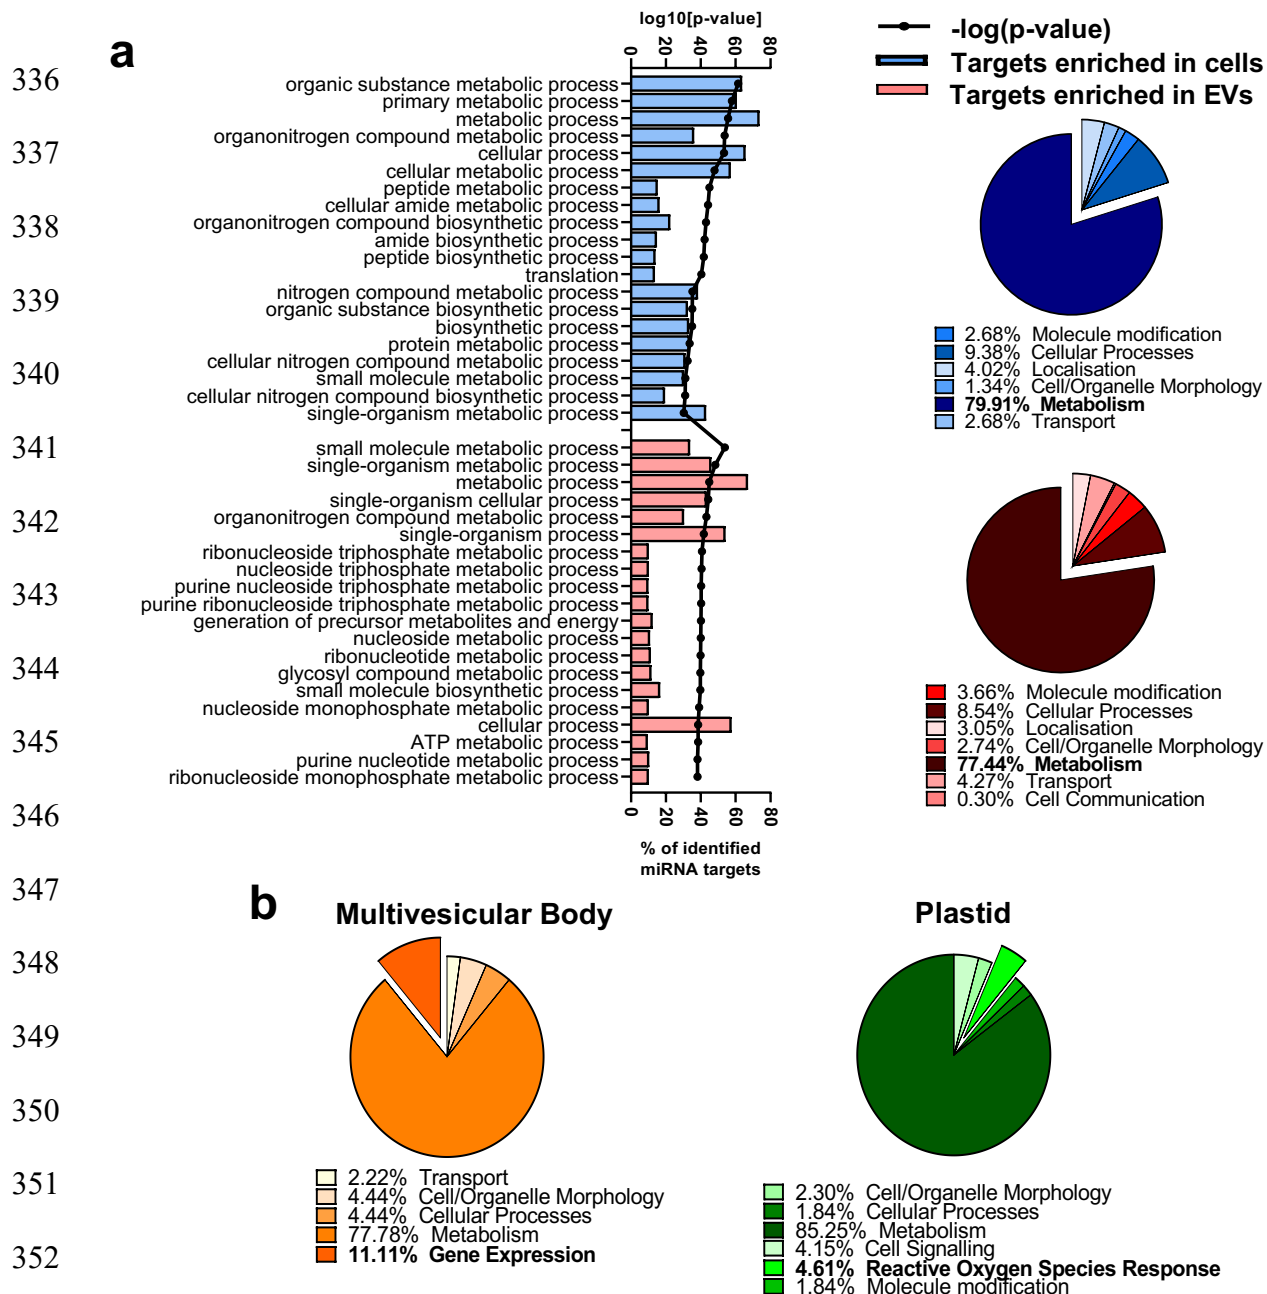



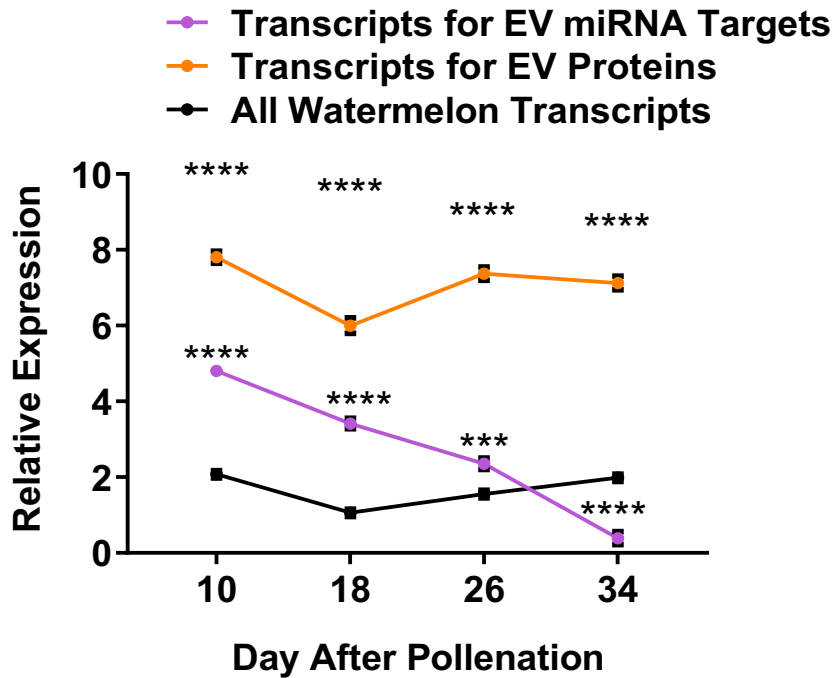

361

362 **Figure 6: Dynamic changes in watermelon EV miRNA and protein levels across**

363 **fruit ripening.** Levels of miRNA target mRNA and the mRNA for proteins found in

364 watermelon EVs were mapped to mRNA levels across watermelon ripening using a

365 publicly available transcriptomics dataset (Zhu et al., 2017). 105-2944 mRNA per

366 datapoint, two-way ANOVA with Sidak's multiple comparisons test, comparisons are to

367 'all watermelon transcripts'. Data are presented as mean  $\pm$  SEM.

368

369 Moreover, the transcripts for proteins present within watermelon EVs were enriched  
370 compared to all watermelon transcripts across this entire period.

## 371 **Discussion**

372 Here we present the first data on the isolation and characterisation of EVs from  
373 watermelon fruit. These EVs are of a size and morphology reminiscent of animal  
374 exosomes<sup>53</sup>. We have also reported the average yield of watermelon EVs per millilitre  
375 of starting juice and the ratio of particles to DNA, RNA and protein. These  
376 characterisations are a first in the plant EV field and are crucial for ensuring that plant  
377 EV studies are executed to the same standard as is expected in the mammalian EV  
378 field. The particle/protein ratio of  $1.85 \times 10^{10}$  particles/ $\mu\text{g}$  protein is considered to be  
379 highly pure<sup>54</sup>, suggesting that the methodology presented here is sufficient to isolate  
380 EVs from watermelon which are free of protein contamination. However, analysis of  
381 other potential contaminant molecules which may be present in watermelon juice, such  
382 as glucose and sucrose, is not currently known.

383 Human exosomes exhibit miRNA<sup>5</sup> and protein<sup>38</sup> profiles that differ from their cells of  
384 origin due to active loading of cargo, a phenomenon we also observed in watermelon  
385 EVs. In watermelon EVs, miRNA sorting appears to be associated with abundance of  
386 cellular target proteins; high levels of cytoplasmic mRNA may sequester miRNA away  
387 from the site of EV biogenesis, as has been previously identified in humans<sup>40</sup>.

388 However, we acknowledge that protein levels are skewed by post-transcriptional  
389 regulation and are therefore an imperfect proxy of mRNA levels. Whilst we did not  
390 observe any discriminating sequence or structural motifs between enriched and non-  
391 enriched miRNAs in watermelon EVs, characterisation of the full complement of cellular  
392 and EV miRNAs is required before this can be confirmed.

393 Several studies have described EVs or EV-like particles isolated from plants using  
394 broadly similar methods to those we employed in this current study<sup>6-15</sup>. Some report  
395 vesicles larger than human exosomes and watermelon EVs<sup>8,9,11</sup>, potentially due to  
396 vigorous isolation techniques (i.e. prolonged blending) resulting in cellular debris.  
397 However, it is also possible that some plant EVs may be constitutively larger, perhaps  
398 due to differences in biogenesis. One of the main determinants of the size of vesicles  
399 isolated by ultracentrifugation is the final pelleting force<sup>55</sup>. Whilst most studies have  
400 pelleted plant EV-like particles at standard forces of 100,000-150,000xg, two studies  
401 reported the isolation of EVs at just 40,000xg<sup>6,15</sup>. However, the lack of reporting on the  
402 rotors or the pelleting k-factor used to isolate EVs precludes direct comparisons,  
403 reinforcing the importance of standardisation in reporting EV isolation and  
404 characterisation.

405 Plastids and MVB are both vesicle-containing organelles<sup>43</sup> and it is therefore  
406 conceivable that both produce plant EVs, perhaps of distinct functionality. More than  
407 half of proposed plant EV markers (i.e., those most conserved in EVs between species)  
408 are present in chromoplasts, around one third in MVB and one tenth in both, supporting  
409 dual origin. Whilst our hypothesis that some watermelon EVs may be generated in  
410 plastids is novel, the cell-to-cell movement of plastid components through an  
411 unidentified mechanism has been reported previously<sup>56</sup>. Movement of the whole plastid  
412 genome between cells was proposed to occur through the movement of intact  
413 plastids<sup>56</sup>, but this hypothesis has been criticised due to the large size of plastids  
414 relative to the diameter of the plasmodesmata channels between cells<sup>57</sup>. Our data  
415 suggest that EVs could be responsible for the transfer of genetic material, as plastid  
416 DNA is present at a relatively high abundance in watermelon EVs. DNA sequencing of  
417 plant EVs would further confirm this hypothesis.

418 We have identified a number of potential plant EV marker proteins. We propose that a  
419 panel of the potential plant EV markers identified herein – perhaps those with highest  
420 fold-enrichment in EVs as compared with cells – be used in future plant EV studies to  
421 enable better understanding of the nature of plant EVs as well as ensuring  
422 standardisation amongst the field. For example, vesicle-associated protein 4-2 which  
423 was identified solely in EVs and is predicted to reside solely in plastids,  
424 adenosylhomocysteinase which resides solely in MVB and enolase which is predicted  
425 to reside in both plastids and MVB and is also highly abundant in mammalian EVs.  
426 Similarly, we recommend that ‘negative’ EV markers from human and animal studies be  
427 extended for use in the plant field, as we have shown a number of these to be valid for  
428 the characterisation of plant EVs. This includes calnexin and histone 2B.  
429 Previous studies investigating EV-like vesicles in plants have focused on their role in  
430 the plant response to infectious agents <sup>29,58</sup>. Our bioinformatic analyses suggest that  
431 plant EVs may also play a role in metabolism and fruit development/ripening. We found  
432 that watermelon EVs contain the machinery needed for the metabolism of sucrose and  
433 glucose, such as glucose-6-phosphate isomerase and sucrose synthase, suggesting  
434 that plant EVs may play a role in the accumulation and metabolism of sugar in fruits,  
435 allowing for rapid tissue expansion and making fruit palatable for seed propagation by  
436 animals. Growth-regulating factors (GRF) 1, 4, 5 and 9 are predicted targets of several  
437 of the most abundant, if not the most enriched, watermelon EV miRNAs, including the  
438 miR-396 family and miR-390-3p. GRFs are downregulated during ripening of  
439 watermelon and other fruits <sup>52,59</sup>. A miR-396-GRF network has been implicated in the  
440 size, maturation and ripening of several fruits, perhaps through influence on the  
441 meristem <sup>60-62</sup>. Furthermore, miR-159c, which is depleted in watermelon EVs, is also  
442 implicated in fruit development and ripening via its targeting of MYB33 <sup>63,64</sup>; this

443 transcription factor is downregulated during watermelon ripening. Overexpression of  
444 miR-159 results in fruit formation in the absence of fertilisation<sup>64,65</sup> and downregulation  
445 of miR-159 results in the production of more spherical fruit in *Arabidopsis thaliana*<sup>66</sup>.  
446 Furthermore, three miRNAs enriched (cla-miR319a, miR399g and cla-miR408) and  
447 three depleted (cla-miR393, miR167a and cla-miR399a) in watermelon EVs target  
448 ethylene-responsive transcription factors and ethylene producing enzymes, suggesting  
449 that they may be involved in ethylene-dependent fruit ripening. Together, these data  
450 suggest that watermelon EV miRNAs could be involved in the initiation and control of  
451 fruit development and ripening.

452 The potential role of plant EVs in fruit ripening represents a novel finding and could,  
453 with further research, aid developing technologies to manipulate this process with the  
454 aim of reducing the economic burden of fruit wastage due to premature ripening and  
455 subsequent spoiling of fruits before they reach the end consumer. Furthermore,  
456 understanding cell-cell communication through EVs in plants could be of use in  
457 agricultural grafting, aiding in the production of crops able to develop fruits/vegetables  
458 in substandard environments, thereby increasing global food production. Grafted plants  
459 share genetic material, with the genetic material from one individual transferring the  
460 other<sup>67-71</sup>. Some have hypothesised that this results from whole nuclei or organelles  
461 passing between the individuals following cell disruption during the grafting process  
462 (reviewed in<sup>72</sup>). However, as mentioned above, the small size of the plasmodesmata<sup>73</sup>  
463 communication channels between cells relative to nuclei or organelles questions the  
464 feasibility of this occurring<sup>57</sup>. Therefore, the current prediction of a potential plastid  
465 origin for watermelon EVs, especially the plastid DNA they contain, raises the  
466 possibility that EVs are a vector for this genetic exchange between grafted species.

467 Further understanding of the role for EVs in grafting could, therefore, aid in increasing  
468 crop yield and resilience.

469 This study contains the first detailed characterisation of plant EVs alongside exploration  
470 of the potential functions of watermelon EV cargo. It is hoped that the observations and  
471 suggestions made herein, including the panel of plant-specific EV markers, will enable  
472 clarity and rigor in the plant EV field moving forward.

## 473 **Methods**

### 474 **Materials**

475 Unless otherwise stated, all reagents were purchased from Sigma-Aldrich.

### 476 **Extracellular vesicle isolation**

477 We have submitted all relevant data of our experiments to the EV-TRACK  
478 knowledgebase (EV-TRACK ID: EV190074)<sup>74</sup>. Watermelons (n=9) were purchased from  
479 a range of local greengrocers and supermarkets. As the variety of watermelons is  
480 usually not given in greengrocers or supermarkets, an effort was made to select  
481 visually similar fruits. All were of a medium size (i.e. not described as 'giant' or 'baby')  
482 and exhibited dark and light green stripes on their rind. Watermelon were from a range  
483 of countries of origin and were purchased throughout the year so as to best reflect the  
484 fruits available to consumers. The watermelon mesocarp was removed from the rind  
485 with a knife and the weight of dissected mesocarp recorded. Dissected mesocarp was  
486 pulsed for 1 second in a standard kitchen blender. This brief blending was sufficient to  
487 disrupt the structure of the mesocarp, but did not break open the seeds or produce a  
488 homogenate. Large tissue fragments were removed using a coarse sieve to leave an  
489 opaque juice. EV isolation was then performed using differential ultracentrifugation at  
490 4°C with a Sorvall Discovery 100SE centrifuge set to 'RCFavg'. Firstly, the juice was  
491 centrifuged at 1,000xg for 10 minutes using the A-621 fixed-angle rotor. The

492 supernatant was then centrifuged twice at 10,000xg for 10 minutes using A-621 fixed  
493 angle rotor to remove the remaining large fragments of tissue, apoptotic bodies and  
494 whole organelles such as plastids. The resulting supernatant was passed through a  
495 0.22µm filter (Merck Millipore) then centrifuged at 100,000xg for 90 minutes (k-factor  
496 207.11) in sterile tubes using the T-1250 fixed-angle rotor. The supernatant was  
497 discarded, and the pellet was resuspended in 200µl of sterile phosphate buffered saline  
498 minus magnesium and calcium. EV size was determined using nanoparticle tracking  
499 analysis (NTA) on a NanoSight LM10 (Malvern). Per sample, 3x60 second videos taken  
500 and were analysed using the NTA 2.3 software. EV morphology was determined using  
501 transmission electron microscopy following negative staining with 1% uranyl acetate.  
502 Images were captured on a JEM1400 transmission electron microscope (Jeol) at 120kV  
503 using a 1k CCD camera (Advanced Microscopy Techniques, Corp.). Watermelon EVs  
504 were compared with those isolated using the same protocol as for watermelon EVs  
505 from culture medium conditioned by Caco-2 cells (ECACC #86010202; approximately  
506  $1.75 \times 10^7$  cells in 50ml culture medium) for 72 hours. Culture medium comprised of  
507 Dulbecco's Modified Eagle Medium (DMEM), 2mM non-essential amino acids, 4mM  
508 glutamine, 100U/L penicillin, 100µg/L streptomycin and 10% (v/v) fetal bovine serum  
509 (Life Technologies Ltd).

#### 510 **miRNA analysis**

511 RNA was isolated from watermelon (n=3) EVs or matched mesocarp cells (1,000xg  
512 centrifugation pellet, k-factor 50430.28) using the miRVana miRNA Isolation Kit  
513 (Thermo Fisher Scientific) with the addition of the Plant RNA Isolation Aid (Thermo  
514 Fisher Scientific) according to the manufacturer's instructions. Following lysis and prior  
515 to RNA isolation, samples were spiked with cel-miR-39 (Qiagen) to allow for  
516 normalisation of extraction efficiency. Reverse transcription was performed on 125ng of

517 RNA – quantified using the NanoDrop 2000c – using the miScript Plant RT kit (Qiagen).  
518 Currently, no products are commercially available for the profiling of watermelon  
519 miRNAs. However, the high level of miRNA homology between plant species  
520 (discussed in <sup>75</sup>) allowed profiling of watermelon miRNAs using a rice (*Oryza sativa*)  
521 qPCR array, which quantifies 84 miRNAs. cDNA samples from EVs and cells were  
522 analysed using the Rice miFinder qPCR array (Qiagen). snoR10, snoR31, snoR5-1a,  
523 U15 and U65-2 qPCR array housekeeping genes were constant in cells and EVs and  
524 were used alongside the internal reverse transcription control and cel-miR-39 for  
525 normalisation. Of the miRNAs on the array, 83 were detected. The melting temperature  
526 of each miRNA was compared between qPCR array plates; a difference of 2°C or more  
527 suggests that a different sequence had been amplified, such miRNAs were removed  
528 from analysis (17 miRNAs). As an additional stringency measure, any rice miRNA with  
529 a sequence containing >2 deviations from the published watermelon sequence (Frizzi  
530 et al., 2014, Liu et al., 2013) were excluded (38 miRNAs). 28 miRNAs were taken  
531 forward for further analysis.

### 532 **Western blot**

533 Caco-2 cells and EVs were lysed in 10x radioimmunoprecipitation assay buffer  
534 (Millipore), with the concentrated buffer being diluted in distilled water for the cells and  
535 in the extracellular vesicle solution for the extracellular vesicles. A total of 30ng of  
536 protein was loaded into a 7.5% or 10% polyacrylamide gel (Bio-Rad) in reducing  
537 conditions. Following gel electrophoresis, proteins were transferred onto a  
538 nitrocellulose membrane (GE Healthcare). Membranes were blocked in 5% bovine  
539 serum albumin in tris-buffered saline for 1 hour before being incubated with primary  
540 antibodies for ALIX (final concentration 1µg/ml; ab24335; Abcam), CD63 (0.5µg/ml;  
541 ab199921; Abcam) or CANX (Calnexin; 1µg/ml; A303-695A; Bethyl Laboratories)



542 overnight at 4°C. Secondary antibody was IRDye 800CW conjugated anti-rabbit IgG  
543 (0.2µg/ml; 926-32213; Li-Cor Biosciences). Blots were incubated for 1 hour with  
544 secondary antibody and then imaged on the Li-Cor Odyssey Sa (Li-Cor Biosciences).

#### 545 **Proteomics**

546 Watermelon (n=3) cells and matched extracellular vesicles were lysed in 10x  
547 radioimmunoprecipitation assay buffer (Millipore), as described above for Caco-2 cells  
548 and EVs. A total of 600µg of protein – quantified using the Bradford protein assay (Bio-  
549 Rad) – was run 5mm into a 10% polyacrylamide gel (Bio-Rad) prior to fixation and  
550 staining using Imperial Protein Stain. The excised protein band was dehydrated using  
551 acetonitrile then dried via vacuum centrifugation. The proteins in the dried gel piece  
552 were reduced with 10mM dithiothreitol then alkylated with 55mM iodoacetamide. The  
553 gel piece was washed twice with 25mM ammonium bicarbonate followed by acetonitrile  
554 and vacuum centrifugation. Finally, the proteins in the gel were digested in trypsin  
555 overnight at 37°C, producing peptides for mass spectrometry analysis. Digested  
556 samples were analysed by liquid chromatography coupled-mass spectrometry/mass  
557 spectrometry (LC-MS/MS) using an UltiMate® 3000 Rapid Separation LC (Dionex  
558 Corporation) coupled to an Orbitrap Elite (Thermo Fisher Scientific, USA) mass  
559 spectrometer. Peptide mixtures were separated for 44 min at 300nl/min<sup>-1</sup> using a  
560 1.7µM Ethylene Bridged Hybrid C18 analytical column (75 mm x 250µm internal  
561 diameter; Waters) and 0.1% formic acid in a gradient of 8-33% acetonitrile. Detected  
562 peptides were then selected for fragmentation automatically by data dependant  
563 analysis. The identified peptides were mapped using Mascot 2.5.1 (Matrix Science UK),  
564 to the *Citrullus lanatus* proteome. Mascot 2.5.1 was used with a fragment tolerance of  
565 0.60 Da (Monoisotopic), a parent tolerance of 5.0 parts per million (Monoisotopic), fixed  
566 modifications of +57 on C (Carbamidomethyl), variable modifications of +16 on M

567 (Oxidation). A maximum of 1 missed cleavage was permitted. Data were validated  
568 using Scaffold (Proteome Software, USA), employing the following thresholds: 95%  
569 protein identification certainty, 1 for the minimum number of unique peptides mapping  
570 to each protein, and 80% peptide identification certainty.

#### 571 **DNA Analysis**

572 DNA was extracted from watermelon (n=3) cells and matched EVs using the ISOLATE  
573 II Plant DNA Kit (Bioline) according the manufacturer's instructions. Briefly, watermelon  
574 cells were ground into a powder using a pestle and mortar with the aid of liquid  
575 nitrogen. Both cells and EVs were lysed using Lysis Buffer PA2. Following DNA  
576 extraction, primers towards actin-7 (Forward: 5'-ATGTTTACAACCACTGCCGAACG-3'  
577 , Reverse: 5'-AATGAGGGATGGCTGGAAAAGAACTT-3'), rbcL (Forward: 5'-  
578 ATGAGTTGTAGGGAGGGACTTATGTCACC-3', Reverse: 5'-  
579 GATTTTCTTCTCCAGGAACAGGCTCG-3') and ccmFn (Forward: 5'-  
580 CCGGCCATAGGTTCGAATCCTG-3', Reverse: 5'-CCGGCCATAGGTTCGAATCCTG-  
581 3') were used to amplify nuclear, plastid and mitochondrial specific DNA respectively  
582 from equal amounts of starting DNA using the Fast Cycling PCR Kit (Qiagen). PCR  
583 products were run on a 2% agarose gel containing GelRed (Biotium) for band  
584 visualisation. Densitometry was conducted using the ImageStudio lite (Li-Cor). The  
585 value of any non-specific amplification in negative controls was removed from all  
586 densitometry values for the respective primer's product.

#### 587 **Bioinformatics analysis**

588 *Oryza sativa* miRNAs were aligned with published watermelon miRNAs using the blastn  
589 mode of BLAST, with those miRNAs with <2 mismatches along the length of the  
590 miRNA (i.e. <10% deviation from the watermelon sequence) being considered  
591 homologous. T-Coffee Multiple Sequence Alignment was used to create a phylogenetic

592 tree of watermelon miRNA sequences. Prediction of miRNA targets was carried out  
593 using psRNAtarget<sup>76</sup> using the *Citrullus lanatus* (watermelon), transcript, Cucurbit  
594 Genomics Database, version 1<sup>77</sup>. FASTA sequences for watermelon proteins were  
595 procured from the Cucurbit Genome Database<sup>77</sup> and were aligned with those from  
596 other plant species and humans using the blastp mode of BLAST. An alignment was  
597 considered to predict a homolog if the query cover was at least 70%, with 50% identity  
598 within this region. In order to predict the subcellular location of EV biogenesis, the  
599 known/annotated subcellular localisation of watermelon EV proteins was obtained from  
600 the Cucurbit Genome Database<sup>77</sup>. The presence of motifs required for sorting into  
601 different subcellular locations was also used to predict subcellular localisation using the  
602 CELLO software<sup>78</sup>. Alignment was also performed to the proteome of watermelon  
603 chromoplasts<sup>50</sup>, the late endosome/MVB proteome of *Arabidopsis thaliana*<sup>51</sup> and  
604 transcriptomics data from ripening watermelon fruit<sup>52</sup>. *Arabidopsis thaliana* MVB data  
605 was used as no watermelon MVB proteome currently exists in the literature.  
606 Hierarchical clustering analysis and principal components analysis was performed  
607 using the ClustVis R package<sup>79</sup>. Proteins and predicted miRNA targets were analysed  
608 for pathway overrepresentation against the whole watermelon proteome using the  
609 Bonferroni test; adjusted p-values of <0.05 were considered significant. This procedure  
610 was carried out using the Cucurbit Genome Database.

### 611 **Statistical analysis**

612 All statistical analysis was performed on GraphPad Prism 8, unless otherwise stated.  
613 All measurements reported are on distinct samples. No samples were measured more  
614 than once for the same parameter, except where technical replicates were taken. In the  
615 case of technical replicates, the mean of these replicates is reported. The individual  
616 statistical tests are given in the relevant methods and figures. In brief, all statistical tests

617 on continuous variables between two groups were analysed using the Mann-Whitney  
618 test. When more than two groups were compared over time, a two-way ANOVA with  
619 Sidak's multiple comparisons test was used. Two-sided tests were used for all  
620 analyses.

## 621 **Data availability**

622 The proteomics and miRNA qPCR array data that support the findings of this study are  
623 available in Vesiclepedia (<http://microvesicles.org/index.html>) with the identifier  
624 currently pending. We will provide the identifier as soon as it is available. Furthermore,  
625 The authors declare that the proteomics, miRNA qPCR array and miRNA predicted  
626 target data supporting the findings of this study are also available within the  
627 supplementary information files.

## 628 **Acknowledgements**

629 Mass spectrometry was conducted by the University of Manchester Bio-MS core  
630 facility. This work was funded through a BBSRC doctoral training partnership PhD  
631 project.

## 632 **References**

- 633 1 Brown, L., Wolf, J. M., Prados-Rosales, R. & Casadevall, A. Through the wall:  
634 extracellular vesicles in Gram-positive bacteria, mycobacteria and fungi. *Nature*  
635 *Reviews Microbiology* **13**, 620-630, doi:10.1038/nrmicro3480 (2015).
- 636 2 van Niel, G., D'Angelo, G. & Raposo, G. Shedding light on the cell biology of  
637 extracellular vesicles. *Nature Reviews Molecular Cell Biology* **19**, 213-228,  
638 doi:10.1038/nrm.2017.125 (2018).
- 639 3 Kosaka, N. *et al.* Secretory Mechanisms and Intercellular Transfer of MicroRNAs in  
640 Living Cells. *Journal of Biological Chemistry* **285**, 17442-17452,  
641 doi:10.1074/jbc.M110.107821 (2010).
- 642 4 Mittelbrunn, M. *et al.* Unidirectional transfer of microRNA-loaded exosomes from T cells  
643 to antigen-presenting cells. *Nature Communications* **2**, doi:10.1038/ncomms1285  
644 (2011).
- 645 5 Valadi, H. *et al.* Exosome-mediated transfer of mRNAs and microRNAs is a novel  
646 mechanism of genetic exchange between cells. *Nat Cell Biol* **9**, 654-659, doi:ncb1596  
647 [pii]  
648 10.1038/ncb1596 (2007).

- 649 6 Rutter, B. D. & Innes, R. W. Extracellular Vesicles Isolated from the Leaf Apoplast Carry  
650 Stress-Response Proteins. *Plant Physiology* **173**, 728-741, doi:10.1104/pp.16.01253  
651 (2017).
- 652 7 Deng, Z. *et al.* Broccoli-Derived Nanoparticle Inhibits Mouse Colitis by Activating  
653 Dendritic Cell AMP-Activated Protein Kinase. *Mol Ther* **25**, 1641-1654,  
654 doi:10.1016/j.ymthe.2017.01.025 (2017).
- 655 8 Mu, J. Y. *et al.* Interspecies communication between plant and mouse gut host cells  
656 through edible plant derived exosome-like nanoparticles. *Molecular Nutrition & Food*  
657 *Research* **58**, 1561-1573, doi:10.1002/mnfr.201300729 (2014).
- 658 9 Zhang, M. *et al.* Edible ginger-derived nanoparticles: A novel therapeutic approach for  
659 the prevention and treatment of inflammatory bowel disease and colitis-associated  
660 cancer. *Biomaterials* **101**, 321-340, doi:10.1016/j.biomaterials.2016.06.018 (2016).
- 661 10 Zhang, M., Wang, X., Han, M. K., Collins, J. F. & Merlin, D. Oral administration of  
662 ginger-derived nanolipids loaded with siRNA as a novel approach for efficient siRNA  
663 drug delivery to treat ulcerative colitis. *Nanomedicine (Lond)* **12**, 1927-1943,  
664 doi:10.2217/nnm-2017-0196 (2017).
- 665 11 Ju, S. W. *et al.* Grape Exosome-like Nanoparticles Induce Intestinal Stem Cells and  
666 Protect Mice From DSS-Induced Colitis. *Molecular Therapy* **21**, 1345-1357,  
667 doi:10.1038/mt.2013.64 (2013).
- 668 12 Pérez-Bermúdez, P., Blesa, J., Soriano, J. M. & Marcilla, A. Extracellular vesicles in  
669 food: Experimental evidence of their secretion in grape fruits. *Eur J Pharm Sci* **98**, 40-  
670 50, doi:10.1016/j.ejps.2016.09.022 (2017).
- 671 13 Wang, B. M. *et al.* Targeted Drug Delivery to Intestinal Macrophages by Bioactive  
672 Nanovesicles Released from Grapefruit. *Molecular Therapy* **22**, 522-534,  
673 doi:10.1038/mt.2013.190 (2014).
- 674 14 Raimondo, S. *et al.* Citrus limon-derived nanovesicles inhibit cancer cell proliferation  
675 and suppress CML xenograft growth by inducing TRAIL-mediated cell death.  
676 *Oncotarget* **6**, 19514-19527, doi:10.18632/oncotarget.4004 (2015).
- 677 15 Regente, M. *et al.* Vesicular fractions of sunflower apoplastic fluids are associated with  
678 potential exosome marker proteins. *Febs Letters* **583**, 3363-3366,  
679 doi:10.1016/j.febslet.2009.09.041 (2009).
- 680 16 Xiao, J. *et al.* Identification of exosome-like nanoparticle-derived microRNAs from 11  
681 edible fruits and vegetables. *PeerJ* **6**, e5186, doi:10.7717/peerj.5186 (2018).
- 682 17 Raposo, G. *et al.* B lymphocytes secrete antigen-presenting vesicles. *Journal of*  
683 *Experimental Medicine* **183**, 1161-1172, doi:10.1084/jem.183.3.1161 (1996).
- 684 18 Futter, C. E., Pearse, A., Hewlett, L. J. & Hopkins, C. R. Multivesicular endosomes  
685 containing internalized EGF-EGF receptor complexes mature and then fuse directly with  
686 lysosomes. *Journal of Cell Biology* **132**, 1011-1023, doi:10.1083/jcb.132.6.1011 (1996).
- 687 19 Donker, R. B. *et al.* The expression profile of C19MC microRNAs in primary human  
688 trophoblast cells and exosomes. *Molecular Human Reproduction* **18**, 417-424,  
689 doi:10.1093/molehr/gas013 (2012).
- 690 20 Van Niel, G. *et al.* Intestinal epithelial cells secrete exosome-like vesicles.  
691 *Gastroenterology* **121**, 337-349, doi:<http://dx.doi.org/10.1053/gast.2001.26263> (2001).
- 692 21 Hunter, M. P. *et al.* Detection of microRNA Expression in Human Peripheral Blood  
693 Microvesicles. *Plos One* **3**, 11, doi:10.1371/journal.pone.0003694 (2008).
- 694 22 Heijnen, H. F. G., Schiel, A. E., Fijnheer, R., Geuze, H. J. & Sixma, J. J. Activated  
695 platelets release two types of membrane vesicles: Microvesicles by surface shedding  
696 and exosomes derived from exocytosis of multivesicular bodies and alpha-granules.  
697 *Blood* **94**, 3791-3799 (1999).
- 698 23 Villarroja-Beltri, C. *et al.* Sumoylated hnRNPA2B1 controls the sorting of miRNAs into  
699 exosomes through binding to specific motifs. *Nature Communications* **4**, 10,  
700 doi:10.1038/ncomms3980 (2013).
- 701 24 Moreno-Gonzalo, O., Fernandez-Delgado, I. & Sanchez-Madrid, F. Post-translational  
702 add-ons mark the path in exosomal protein sorting. *Cellular and Molecular Life Sciences*  
703 **75**, 1-19, doi:10.1007/s00018-017-2690-y (2018).

- 704 25 Holme, P. A., Brosstad, F. & Solum, N. O. The difference between platelet and plasma  
705 FXIII used to study the mechanism of platelet microvesicle formation. *Thrombosis and*  
706 *Haemostasis* **70**, 681-686 (1993).
- 707 26 Hristov, M., Erl, W., Linder, S. & Weber, P. C. Apoptotic bodies from endothelial cells  
708 enhance the number and initiate the differentiation of human endothelial progenitor cells  
709 in vitro. *Blood* **104**, 2761-2766 (2004).
- 710 27 Cotter, T. G., Lennon, S. V., Glynn, J. M. & Green, D. R. Microfilament-disrupting  
711 agents prevent the formation of apoptotic bodies in tumour cells undergoing apoptosis.  
712 *Cancer Research* **52**, 997-1005 (1992).
- 713 28 Jiang, L. *et al.* Determining the contents and cell origins of apoptotic bodies by flow  
714 cytometry. *Scientific Reports* **7**, doi:10.1038/s41598-017-14305-z (2017).
- 715 29 An, Q. L., Huckelhoven, R., Kogel, K. H. & Van Bel, A. J. E. Multivesicular bodies  
716 participate in a cell wall-associated defence response in barley leaves attacked by the  
717 pathogenic powdery mildew fungus. *Cellular Microbiology* **8**, 1009-1019,  
718 doi:10.1111/j.1462-5822.2006.00683.x (2006).
- 719 30 Baldrich, P. *et al.* Plant Extracellular Vesicles Contain Diverse Small RNA Species and  
720 Are Enriched in 10-to 17-Nucleotide "Tiny" RNAs. *Plant Cell* **31**, 315-324,  
721 doi:10.1105/tpc.18.00872 (2019).
- 722 31 Cai, Q. *et al.* Plants send small RNAs in extracellular vesicles to fungal pathogen to  
723 silence virulence genes. *Science* **360**, 1126-1129, doi:10.1126/science.aar4142 (2018).
- 724 32 Rutter, B. D. & Innes, R. W. Extracellular vesicles as key mediators of plant-microbe  
725 interactions. *Current Opinion in Plant Biology* **44**, 16-22, doi:10.1016/j.pbi.2018.01.008  
726 (2018).
- 727 33 Regente, M., Monzon, G. C. & de la Canal, L. Phospholipids are present in extracellular  
728 fluids of imbibing sunflower seeds and are modulated by hormonal treatments. *Journal*  
729 *of Experimental Botany* **59**, 553-562, doi:10.1093/jxb/erm329 (2008).
- 730 34 Gonorazky, G., Laxalt, A. M., Testerink, C., Munnik, T. & De La Canal, L.  
731 Phosphatidylinositol 4-phosphate accumulates extracellularly upon xylanase treatment  
732 in tomato cell suspensions. *Plant Cell and Environment* **31**, 1051-1062,  
733 doi:10.1111/j.1365-3040.2008.01818.x (2008).
- 734 35 Regente, M., Pinedo, M., Elizalde, M. & de la Canal, L. Apoplastic exosome-like  
735 vesicles A new way of protein secretion in plants? *Plant Signaling & Behavior* **7**, 544-  
736 546, doi:10.4161/psb.19675 (2012).
- 737 36 Baietti, M. F. *et al.* Syndecan-syntenin-ALIX regulates the biogenesis of exosomes.  
738 *Nature Cell Biology* **14**, 677-685, doi:10.1038/ncb2502 (2012).
- 739 37 Iavello, A. *et al.* Role of Alix in miRNA packaging during extracellular vesicle biogenesis.  
740 *International Journal of Molecular Medicine* **37**, 958-966, doi:10.3892/ijmm.2016.2488  
741 (2016).
- 742 38 Haraszti, R. A. *et al.* High-resolution proteomic and lipidomic analysis of exosomes and  
743 microvesicles from different cell sources. *Journal of Extracellular Vesicles* **5**,  
744 doi:10.3402/jev.v5.32570 (2016).
- 745 39 Théry, C. *et al.* Minimal information for studies of extracellular vesicles 2018  
746 (MISEV2018): a position statement of the International Society for Extracellular Vesicles  
747 and update of the MISEV2014 guidelines. *Journal of Extracellular Vesicles* **8**, 1535750,  
748 doi:10.1080/20013078.2018.1535750 (2019).
- 749 40 Squadrito, M. L. *et al.* Endogenous RNAs Modulate MicroRNA Sorting to Exosomes and  
750 Transfer to Acceptor Cells. *Cell Reports* **8**, 1432-1446, doi:10.1016/j.celrep.2014.07.035  
751 (2014).
- 752 41 Kim, D. K. *et al.* EVpedia: a community web portal for extracellular vesicles research.  
753 *Bioinformatics* **31**, 933-939, doi:10.1093/bioinformatics/btu741 (2015).
- 754 42 Kalra, H. *et al.* Vesiclepedia: A Compendium for Extracellular Vesicles with Continuous  
755 Community Annotation. *Plos Biology* **10**, doi:10.1371/journal.pbio.1001450 (2012).
- 756 43 Lindquist, E., Solymosi, K. & Aronsson, H. Vesicles Are Persistent Features of Different  
757 Plastids. *Traffic* **17**, 1125-1138, doi:10.1111/tra.12427 (2016).

- 758 44 Westphal, S., Soll, J. & Vothknecht, U. C. A vesicle transport system inside  
759 chloroplasts. *Febs Letters* **506**, 257-261, doi:10.1016/s0014-5793(01)02931-3 (2001).
- 760 45 Morre, D. J., Sellden, G., Sundqvist, C. & Sandelius, A. S. STROMAL LOW-  
761 TEMPERATURE COMPARTMENT DERIVED FROM THE INNER MEMBRANE OF  
762 THE CHLOROPLAST ENVELOPE. *Plant Physiology* **97**, 1558-1564,  
763 doi:10.1104/pp.97.4.1558 (1991).
- 764 46 Zhang, L., Kato, Y., Otters, S., Vothknecht, U. C. & Sakamoto, W. Essential Role of  
765 VIPP1 in Chloroplast Envelope Maintenance in Arabidopsis. *Plant Cell* **24**, 3695-3707,  
766 doi:10.1105/tpc.112.103606 (2012).
- 767 47 Aseeva, E. *et al.* Vipp1 is required for basic thylakoid membrane formation but not for  
768 the assembly of thylakoid protein complexes. *Plant Physiology and Biochemistry* **45**,  
769 119-128, doi:10.1016/j.plaphy.2007.01.005 (2007).
- 770 48 Kroll, D. *et al.* VIPP1, a nuclear gene of Arabidopsis thaliana essential for thylakoid  
771 membrane formation. *Proceedings of the National Academy of Sciences of the United*  
772 *States of America* **98**, 4238-4242, doi:10.1073/pnas.061500998 (2001).
- 773 49 Caiola, M. G. & Canini, A. Ultrastructure of chromoplasts and other plastids in *Crocus*  
774 *sativus* L. (Iridaceae). *Plant Biosystems* **138**, 43-52,  
775 doi:10.1080/11263500410001684116 (2004).
- 776 50 Wang, Y. Q. *et al.* Proteomic analysis of chromoplasts from six crop species reveals  
777 insights into chromoplast function and development. *Journal of Experimental Botany* **64**,  
778 949-961, doi:10.1093/jxb/ers375 (2013).
- 779 51 Heard, W., Sklenar, J., Tome, D. F. A., Robatzek, S. & Jones, A. M. E. Identification of  
780 Regulatory and Cargo Proteins of Endosomal and Secretory Pathways in Arabidopsis  
781 thaliana by Proteomic Dissection. *Molecular & Cellular Proteomics* **14**, 1796-1813,  
782 doi:10.1074/mcp.M115.050286 (2015).
- 783 52 Zhu, Q. L. *et al.* Comparative transcriptome analysis of two contrasting watermelon  
784 genotypes during fruit development and ripening. *Bmc Genomics* **18**,  
785 doi:10.1186/s12864-016-3442-3 (2017).
- 786 53 They, C., Amigorena, S., Raposo, G. & Clayton, A. Isolation and characterization of  
787 exosomes from cell culture supernatants and biological fluids. *Current protocols in cell*  
788 *biology* **Chapter 3**, Unit 3.22-Unit 23.22, doi:10.1002/0471143030.cb0322s30 (2006).
- 789 54 Webber, J. & Clayton, A. How pure are your vesicles? *Journal of Extracellular Vesicles*  
790 **2**, 19861, doi:10.3402/jev.v2i0.19861 (2013).
- 791 55 Witwer, K. W. *et al.* Standardization of sample collection, isolation and analysis methods  
792 in extracellular vesicle research. *Journal of extracellular vesicles* **2**,  
793 doi:10.3402/jev.v2i0.20360 (2013).
- 794 56 Thyssen, G., Svab, Z. & Maliga, P. Cell-to-cell movement of plastids in plants.  
795 *Proceedings of the National Academy of Sciences of the United States of America* **109**,  
796 2439-2443, doi:10.1073/pnas.1114297109 (2012).
- 797 57 Bobik, K. & Burch-Smith, T. M. Chloroplast signaling within, between and beyond cells.  
798 *Frontiers in Plant Science* **6**, doi:10.3389/fpls.2015.00781 (2015).
- 799 58 Nielsen, M. E., Feechan, A., Boehlenius, H., Ueda, T. & Thordal-Christensen, H.  
800 Arabidopsis ARF-GTP exchange factor, GNOM, mediates transport required for innate  
801 immunity and focal accumulation of syntaxin PEN1. *Proceedings of the National*  
802 *Academy of Sciences of the United States of America* **109**, 11443-11448,  
803 doi:10.1073/pnas.1117596109 (2012).
- 804 59 Liu, X. *et al.* Identification and transcript profiles of citrus growth-regulating factor genes  
805 involved in the regulation of leaf and fruit development. *Molecular Biology Reports* **43**,  
806 1059-1067, doi:10.1007/s11033-016-4048-1 (2016).
- 807 60 Wang, L. *et al.* miR396-targeted AtGRF transcription factors are required for  
808 coordination of cell division and differentiation during leaf development in Arabidopsis.  
809 *Journal of Experimental Botany* **62**, 761-773, doi:10.1093/jxb/erq307 (2011).
- 810 61 Wang, L., Du, H. Y. & Wuyun, T. N. Genome-Wide Identification of MicroRNAs and  
811 Their Targets in the Leaves and Fruits of *Eucommia ulmoides* Using High-Throughput  
812 Sequencing. *Frontiers in Plant Science* **7**, 15, doi:10.3389/fpls.2016.01632 (2016).

- 813 62 Cao, D. Y. *et al.* Regulations on growth and development in tomato cotyledon, flower  
814 and fruit via destruction of miR396 with short tandem target mimic. *Plant Science* **247**,  
815 1-12, doi:10.1016/j.plantsci.2016.02.012 (2016).
- 816 63 Csukasi, F. *et al.* Two strawberry miR159 family members display developmental-  
817 specific expression patterns in the fruit receptacle and cooperatively regulate Fa-  
818 GAMYB. *New Phytologist* **195**, 47-57, doi:10.1111/j.1469-8137.2012.04134.x (2012).
- 819 64 da Silva, E. M. *et al.* microRNA159-targeted SIGAMYB transcription factors are required  
820 for fruit set in tomato. *Plant Journal* **92**, 95-109, doi:10.1111/tpj.13637 (2017).
- 821 65 Palatnik, J. F. *et al.* Sequence and expression differences underlie functional  
822 specialization of Arabidopsis microRNAs miR159 and miR319. *Dev Cell* **13**, 115-125,  
823 doi:10.1016/j.devcel.2007.04.012 (2007).
- 824 66 Allen, R. S. *et al.* Genetic analysis reveals functional redundancy and the major target  
825 genes of the Arabidopsis miR159 family. *Proceedings of the National Academy of*  
826 *Sciences of the United States of America* **104**, 16371-16376,  
827 doi:10.1073/pnas.0707653104 (2007).
- 828 67 Stegemann, S. & Bock, R. Exchange of Genetic Material Between Cells in Plant Tissue  
829 Grafts. *Science* **324**, 649-651, doi:10.1126/science.1170397 (2009).
- 830 68 Molnar, A. *et al.* Small Silencing RNAs in Plants Are Mobile and Direct Epigenetic  
831 Modification in Recipient Cells. *Science* **328**, 872-875, doi:10.1126/science.1187959  
832 (2010).
- 833 69 Fragoso, V., Goddard, H., Baldwin, I. T. & Kim, S. G. A simple and efficient  
834 micrografting method for stably transformed *Nicotiana attenuata* plants to examine  
835 shoot-root signaling. *Plant Methods* **7**, 8, doi:10.1186/1746-4811-7-34 (2011).
- 836 70 Melnyk, C. W., Molnar, A., Bassett, A. & Baulcombe, D. C. Mobile 24 nt Small RNAs  
837 Direct Transcriptional Gene Silencing in the Root Meristems of *Arabidopsis thaliana*.  
838 *Current Biology* **21**, 1678-1683, doi:10.1016/j.cub.2011.08.065 (2011).
- 839 71 Buhtz, A., Pieritz, J., Springer, F. & Kehr, J. Phloem small RNAs, nutrient stress  
840 responses, and systemic mobility. *Bmc Plant Biology* **10**, 13, doi:10.1186/1471-2229-  
841 10-64 (2010).
- 842 72 Wang, J., Jiang, L. B. & Wu, R. L. Plant grafting: how genetic exchange promotes  
843 vascular reconnection. *New Phytologist* **214**, 56-65, doi:10.1111/nph.14383 (2017).
- 844 73 Pina, A., Errea, P. & Martens, H. J. Graft union formation and cell-to-cell communication  
845 via plasmodesmata in compatible and incompatible stem unions of *Prunus* spp. *Scientia*  
846 *Horticulturae* **143**, 144-150, doi:10.1016/j.scienta.2012.06.017 (2012).
- 847 74 Van Deun, J. *et al.* EV-TRACK: transparent reporting and centralizing knowledge in  
848 extracellular vesicle research. *Nature Methods* **14**, 228-232, doi:10.1038/nmeth.4185  
849 (2017).
- 850 75 Li, A. L. & Mao, L. Evolution of plant microRNA gene families. *Cell Research* **17**, 212-  
851 218, doi:10.1038/sj.cr.7310113 (2007).
- 852 76 Dai, X. B. & Zhao, P. X. psRNATarget: a plant small RNA target analysis server. *Nucleic*  
853 *Acids Research* **39**, W155-W159, doi:10.1093/nar/gkr319 (2011).
- 854 77 Feilab. 'Cucurbit Genome Database', <<http://cucurbitgenomics.org/>> (2017).
- 855 78 Yu, C.-S., Chen, Y.-C., Lu, C.-H. & Hwang, J.-K. Prediction of protein subcellular  
856 localization. *Proteins: Structure, Function, and Bioinformatics* **64**, 643-651,  
857 doi:10.1002/prot.21018 (2006).
- 858 79 Metsalu, T. & Vilo, J. ClustVis: a web tool for visualizing clustering of multivariate data  
859 using Principal Component Analysis and heatmap. *Nucleic Acids Research* **43**, W566-  
860 W570, doi:10.1093/nar/gkv468 (2015).
- 861
